# Supplementary material for: Pyrazine dioxide bridged two-dimensional antiferromagnets [M(NCS)2(pzdo)2] (M = Mn, Co; pzdo = pyrazine dioxide)Electronic supplementary information (ESI) available: Fig. S1: two types of coordination mode for pzdo. Fig. S2: perspective view of compound 2 along the [010] direction. See http://www.rsc.org/suppdata/cc/b1/b107334f/
Source: Royal Society of Chemistry journal article supplement (doi:10.1039/b107334f), 2001-11-23
Supplement: b107334f.pdf [file b107334f.pdf]

## Electronic Supplementary Information (ESI)

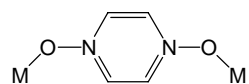

cis

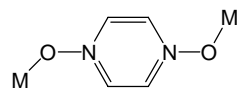

trans

S1. Two kinds of coordination models for pzdo.

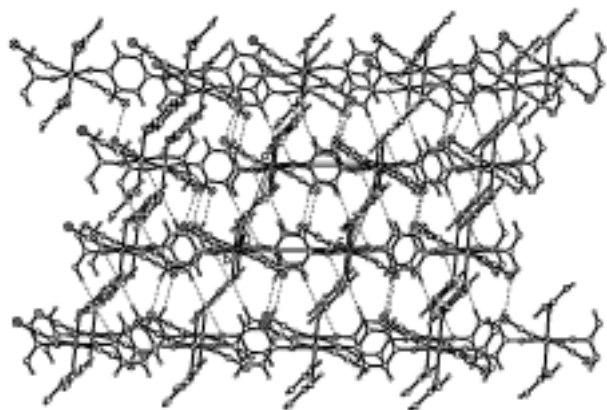

S2. Perspective view of compound **2** along [010] direction, showing the C-H...O weak hydrogen bonding between layers.

[O2...H2a = 2.564 Å, C2a-H2a...O2 = 159.3°; O1...H4b = 2.355 Å, C4b-H4b...O1 = 144.21°. a = -x+1, -y, -z, b = -x, -y, -z].
